# Supplementary material for: Efficient Visible-Light Driven Photocatalytic Hydrogen Production by Z-Scheme ZnWO4/Mn0.5Cd0.5S Nanocomposite without Precious Metal Cocatalyst
Source: MDPI journal article supplement (doi:10.3390/catal12121527), 2022-11-27
Supplement: s1 [file s1]

Archive with 1 entries (1 files):
- catalysts-2055165-supplementary.pdf
