# Supplementary material for: Efficient Visible-Light Driven Photocatalytic Hydrogen Production by Z-Scheme ZnWO4/Mn0.5Cd0.5S Nanocomposite without Precious Metal Cocatalyst
Source: MDPI journal article supplement (doi:10.3390/catal12121527), 2022-11-27
Supplement: s1 [file s1 › catalysts-2055165-supplementary.pdf]

# Efficient Visible-Light Driven Photocatalytic Hydrogen Production by Z-Scheme $\text{ZnWO}_4/\text{Mn}_{0.5}\text{Cd}_{0.5}\text{S}$ Nanocomposite without Precious Metal Cocatalyst

Tingting Ma <sup>1</sup>, Zhen Li <sup>2</sup>, Gan Wang <sup>1</sup>, Jinfeng Zhang <sup>3,\*</sup> and Zhenghua Wang <sup>1,\*</sup>

<sup>1</sup> Key Laboratory of Functional Molecular Solids, Ministry of Education, College of Chemistry and Materials Science, Anhui Normal University, Wuhu 241000, China

<sup>2</sup> School of Food Engineering, Anhui Science and Technology University, Fengyang 233100, China

<sup>3</sup> Anhui Province Key Laboratory of Pollutant Sensitive Materials and Environmental Remediation, School of Physics and Electronic Information, Huaibei Normal University, Huaibei 235000, China

\* Correspondence: jfzhang@chnu.edu.cn (J.Z.); zhwang@ahnu.edu.cn (Z.W.)

## 1. Characterization

X-ray powder diffraction (XRD) patterns were obtained on a SmartLab diffractometer. Scanning electron microscopy (SEM) images were captured on a Hitachi S-8100 microscope. Energy dispersive spectroscopy (EDS) and elemental mapping images were obtained on an attachment to the SEM. Transmission electron microscopy (TEM) images were captured on a FEI Tecnai G<sup>2</sup>-20 microscope. X-ray photoelectron spectra (XPS) were taken on an ESCALab MKII X-ray photoelectron spectrometer. The powder samples were pressed into tablets for XPS analysis. UV-vis diffuse reflectance spectroscopy (DRS) was tested by a Shimadzu UV-2450 spectrometer with MgO powder as the reference. N<sub>2</sub> adsorption–desorption isotherms were tested on a Micromeritics ASAP 2460 volumetric adsorption equipment at 77 K using Barrett-Emmett-Teller (BET) calculations for surface area. The active radical was measured by electron spin resonance (EPR, Bruker F-67166, Wissembourg) spectra. Electrochemical responses were tested by a Chenhua CHI760E electrochemical analyzer. The electrolyte solution was 1.0 M Na<sub>2</sub>SO<sub>4</sub>. The working electrode was prepared by mixing 10 mg catalyst with 10  $\mu$ L 5% Nafion and 0.1 mL ethyl alcohol to form a slurry, and then coating the slurry onto a 1.0 cm<sup>2</sup> ITO conductive glass. The photocatalytic activity for H<sub>2</sub> evolution test was performed on a gas chromatograph (GC-126N, INESA, China)

## 2. Equations

The valence bands ( $E_{VB}$ ) and conduction bands ( $E_{CB}$ ) of Mn<sub>0.5</sub>Cd<sub>0.5</sub>S and ZnWO<sub>4</sub> are obtained by the following Equations (S1)–(S3):

$$\alpha(h\nu) = A(h\nu - E_g)^{1/2} \quad (S1)$$

$$E_{VB} = X - E^e + 0.5E_g \quad (S2)$$

$$E_{CB} = E_{VB} - E_g \quad (S3)$$

Here,  $\alpha$  represents for absorption coefficient,  $h$  represents for Planck coefficient,  $\nu$  represents for frequency, and  $A$  represents for constant. The  $X$  values of  $\text{Mn}_{0.5}\text{Cd}_{0.5}\text{S}$  and  $\text{ZnWO}_4$  are 5.01 and 6.03, respectively.  $E^e$  is a constant with a value of 4.5 eV.

### 3. Computational detail

Computational detail: We use density functional theory (DFT) to describe plane wave expansion of wave function, pseudopotential description of electron-nucleus interaction and first-principle pseudopotential of electron-electron interaction. We used CASTEP (Cambridge Serial Total Energy Package) in materials studio to calculate. The generalized gradient approximation (GGA) proposed by Perdew-Burke-Ernzerhof (PBE) is used to deal with forward variations and related interactions. The convergence accuracy is set to Fine. A vacuum layer of 20 Å was constructed to eliminate interactions between periodic structures of surface models. Other parameters use default values.

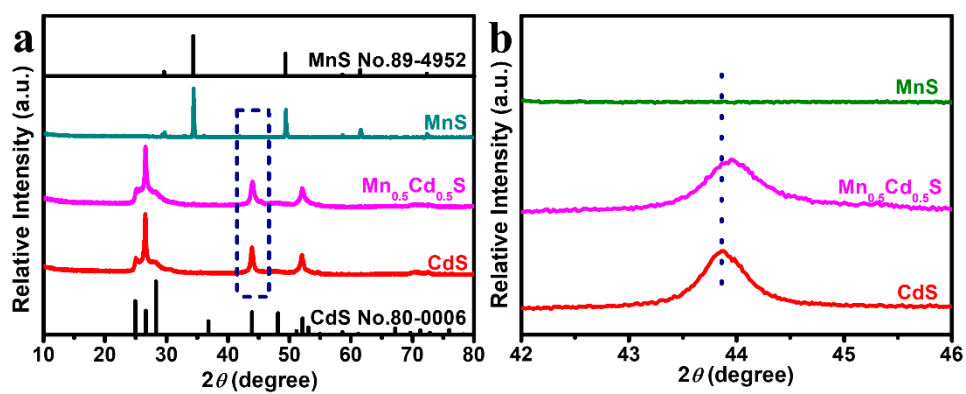

**Figure S1.** (a) XRD patterns of as-prepared CdS, MnS and Mn<sub>0.5</sub>Cd<sub>0.5</sub>S (S1. (b) is an enlarged view of the dotted box area.).

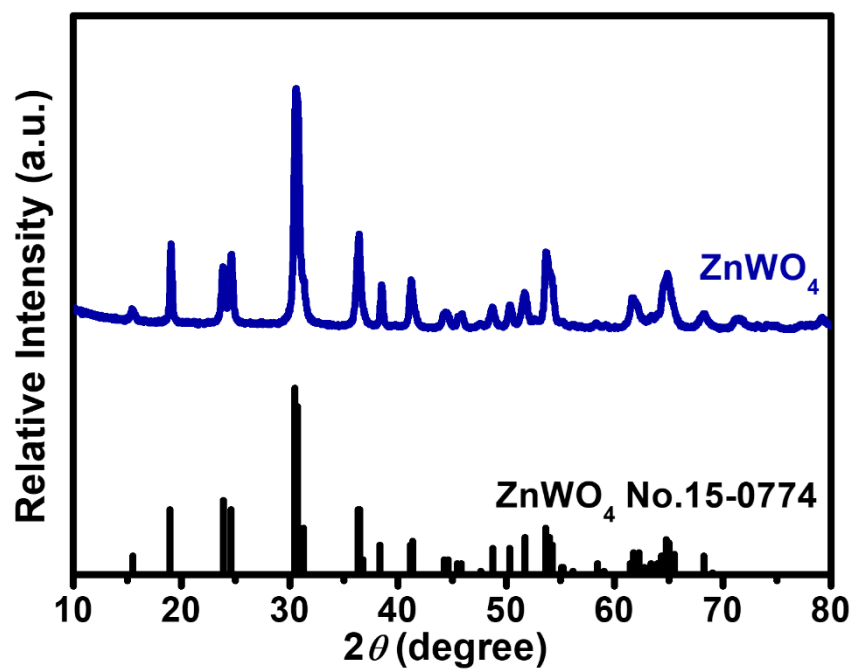

**Figure S2.** XRD patterns of as-prepared  $\text{ZnWO}_4$ .

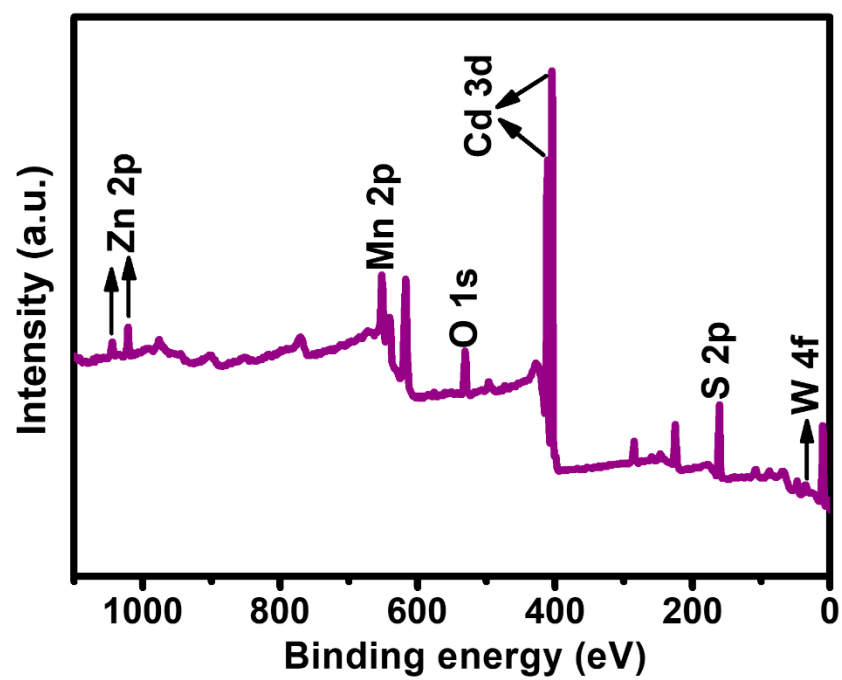

**Figure S3.** XPS survey spectra of ZWMCS-2 nanocomposite.

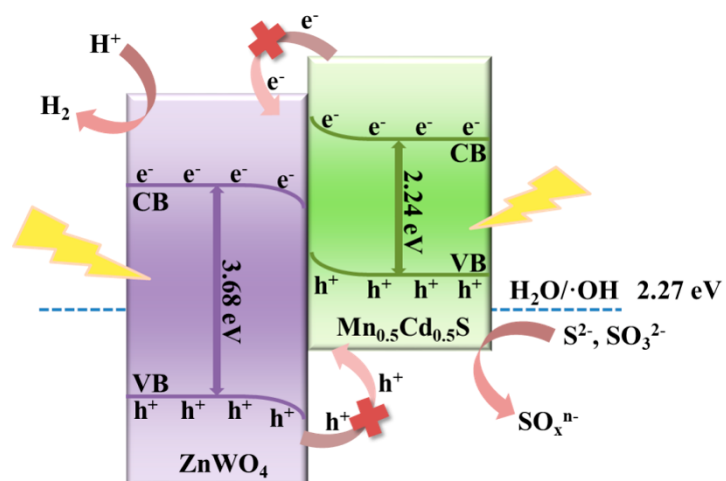

**Figure S4.** The schematic diagrams of charge transfer in supposed Type-II heterojunction.
